# Supplementary material
Source: ML conference proceedings conference paper supplement (https://openaccess.thecvf.com/content/ICCV2021/html/Zhu_Weakly_Supervised_3D_ICCV_2021_paper.html)
Supplement: Supplementary file 1 [file Zhu_Weakly_Supervised_3D_ICCV_2021_supplemental.pdf]

# Weakly Supervised 3D Semantic Segmentation Using Cross-Image Consensus and Inter-Voxel Affinity Relations

## Supplementary Material

Xiaoyu Zhu<sup>1</sup>    Jeffrey Chen<sup>1</sup>    Xiangrui Zeng<sup>1</sup>    Junwei Liang<sup>1</sup>  
Chengqi Li<sup>2</sup>    Sinuo Liu<sup>1</sup>    Sima Behpour<sup>1</sup>    Min Xu<sup>1\*</sup>  
<sup>1</sup>Carnegie Mellon University    <sup>2</sup>University of California San Diego  
{xiaoyuz3, jc6, xiangruiz, junweil, mxu1}@cs.cmu.edu  
{lichengqi0805, liusinuo1994, sima.behpour}@gmail.com

### 1. Ablation Study

#### Ablation Study of Co-Occurrence Learning Module.

We test the effects of different weights used in combining Grad-CAM map and co-occurrence map. The experiments are performed on the dataset with SNR 0.03. We report the mIoU evaluation results in Figure 1 with Grad-CAM map weight from 0 to 1 in steps of 0.1. Assuming the weight of Grad-CAM is  $w_1$ , then the weight of the co-occurrence map is  $1 - w_1$ . We observe that the model gets significant performance improvements from combining Grad-CAM map with the co-occurrence map. The model gets the best performance when the Grad-CAM weight equals 0.3 and the co-occurrence weight equals 0.7.

full segmentation supervision. Our proposed network can generate more accurate segmentation results compared to image-level baselines, and produce comparable results to the model trained with stronger supervision.

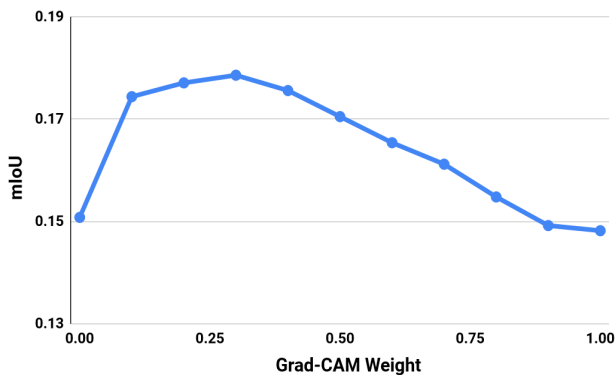

Figure 1: Ablation Study of Co-Occurrence Learning.

### 2. Qualitative Analysis

We visualize the semantic segmentation results produced by different baselines and *CIVA-Net* in Figure 2. Grad-CAM, Respond-CAM and our *CIVA-Net* are trained with image-level class labels. VoxResNet is trained with

\*Corresponding Author

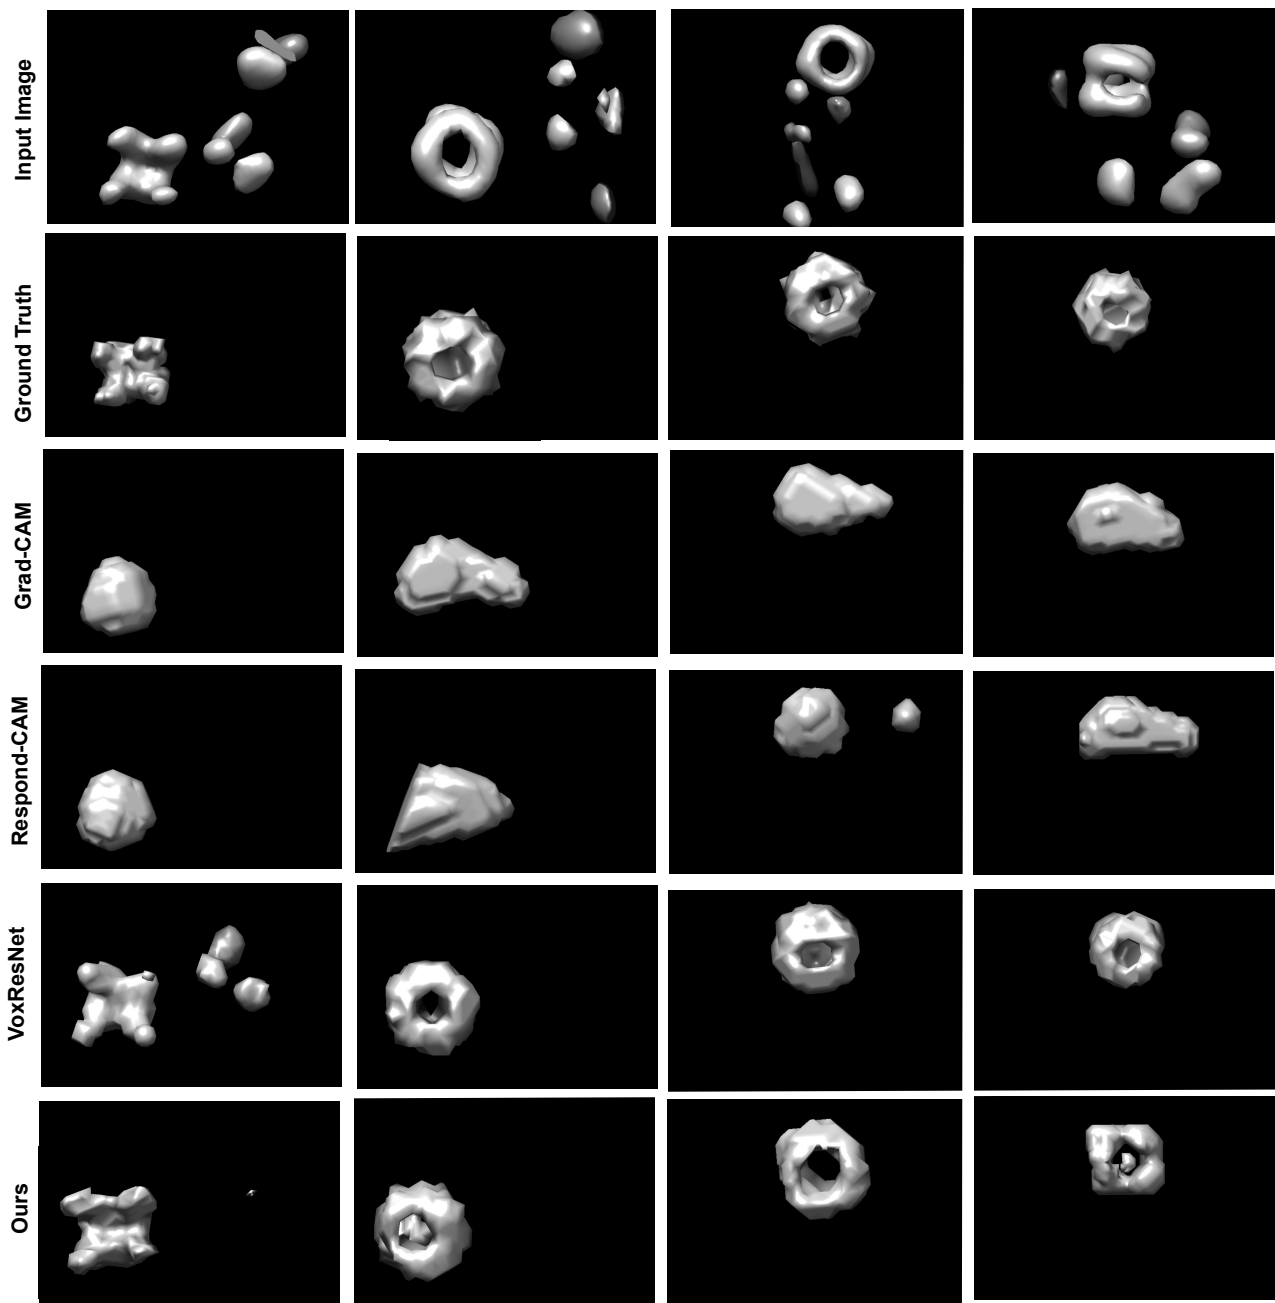

Figure 2: Visualization of different baselines and *CIVA-Net*.
